# Supplementary material
Source: publisher figshare collection journal article supplement (https://springernature.figshare.com/ndownloader/files/18512054)
Supplement: Supplementary file [file 18512054]

Table S2. Statistics of the reads for each condition mapped onto the reference genome of *P. vulgaris* using the Burrows-Wheeler Aligner (BWA).

|                                       | Control         | <i>PvRbohB</i> -<br>RNAi | Control_Rhiz* | <i>PvRbohB</i> -<br>RNAi_Rhiz | Control_Myc* | <i>PvRbohB</i> -<br>RNAi_Myc |
|---------------------------------------|-----------------|--------------------------|---------------|-------------------------------|--------------|------------------------------|
| Percentage<br>of mapped<br>reads      | 98.31–<br>98.83 | 97.82–<br>98.68          | 96.48–98.18   | 95.85–96.85                   | 97.09–98.55  | 98.58–98.90                  |
| Total<br>number of<br>mapped<br>genes | 23,135          | 23,100                   | 22,393        | 22,410                        | 22,559       | 23,357                       |

\*Rhiz, inoculated with *R. tropici*; Myc, inoculated with *R. irregularis*.
